# Supplementary material
Source: publisher figshare collection journal article supplement (https://acs.figshare.com/ndownloader/files/4091242)
Supplement: Supplementary file 1 [file 4091242]

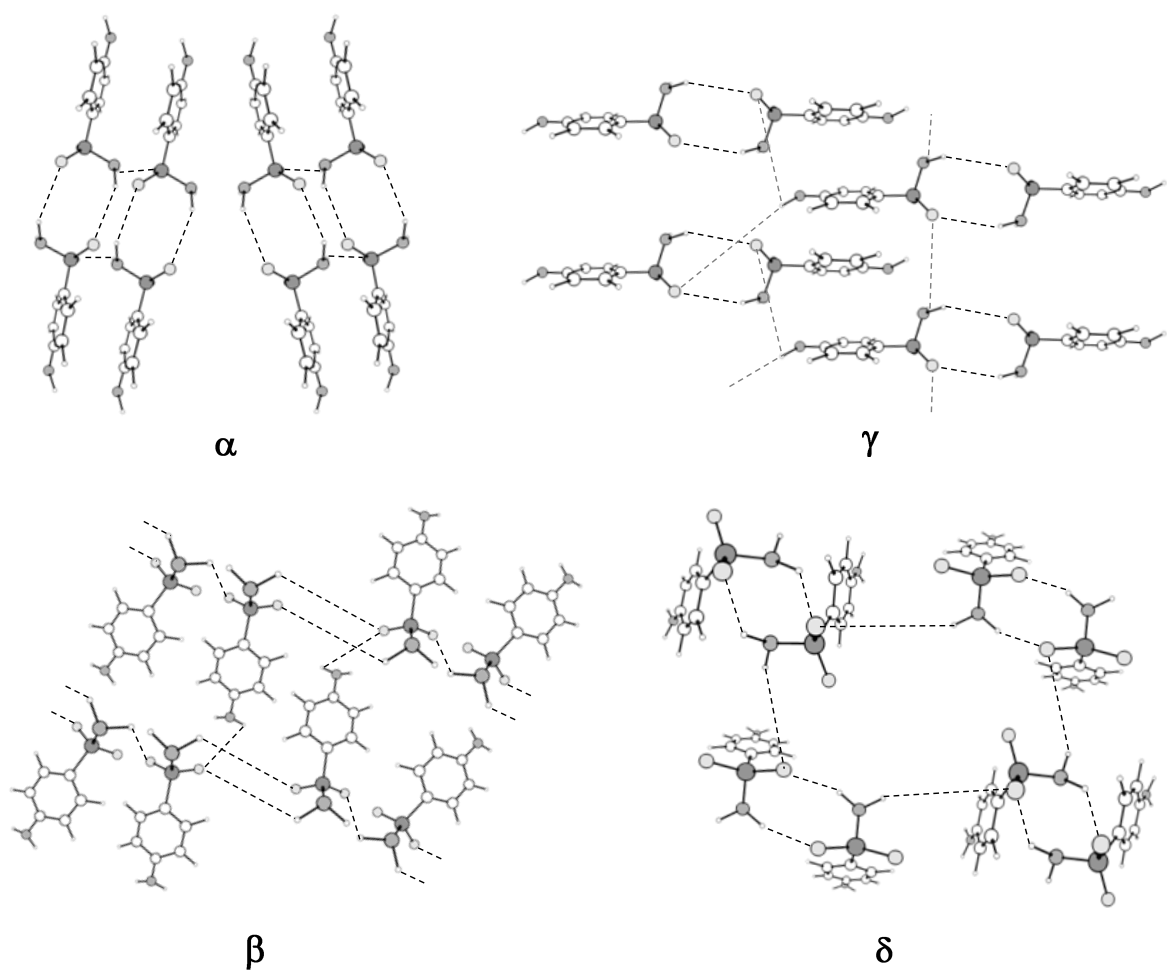

**Figure S1.** Schematic representation of the constituting units of the  $\alpha$ ,  $\beta$ ,  $\gamma$  and  $\delta$  polymorphs of sulfanilamide (adapted from references [15-20]).
